# Supplementary material
Source: publisher figshare collection journal article supplement (https://acs.figshare.com/ndownloader/files/4714150)
Supplement: Supplementary file 1 [file 4714150]

## **Supporting Information Cover Sheet**

Biosorption of Nonpolar Hydrophobic Organic Compounds to *Escherichia Coli*

Facilitated by Metal and Proton Surface Binding

Lin Xiao, Xiaolei Qu, and Dongqiang Zhu<sup>\*</sup>

State Key Laboratory of Pollution Control and Resource Reuse, and School of the

Environment, Nanjing University, Jiangsu 210093, P.R. China

Submitted to *Environmental Science & Technology*

Prepared on *February 1, 2007*

Number of pages: 4

Number of figures: 3

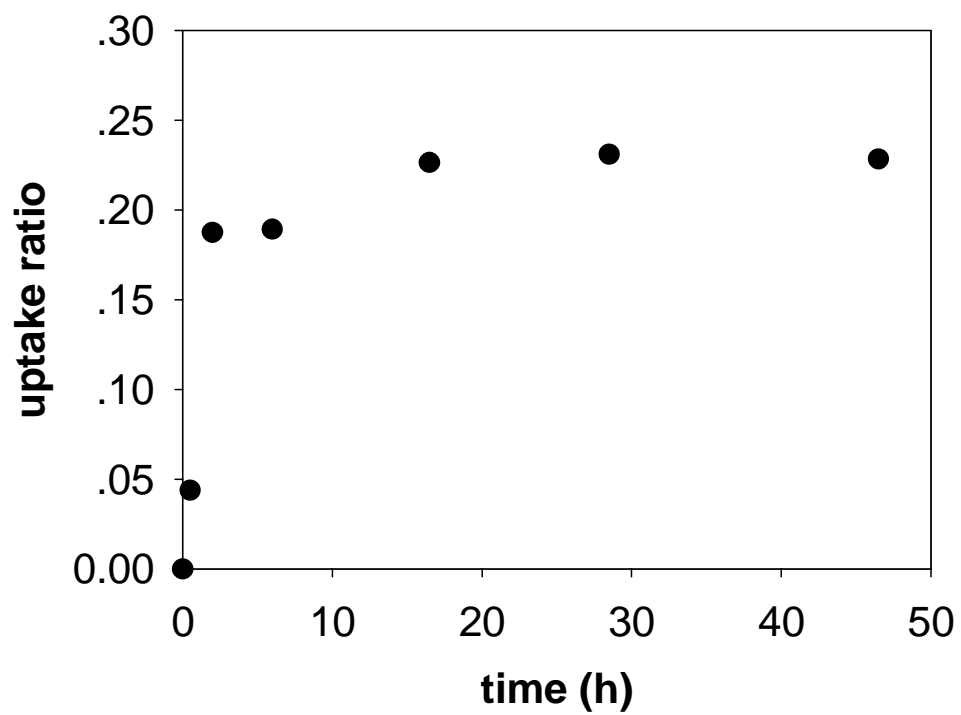

Figure S1. Sorption kinetics of PHEN to *E. coli* in 0.02 M NaNO<sub>3</sub>, plotted as uptake ratio vs. time.

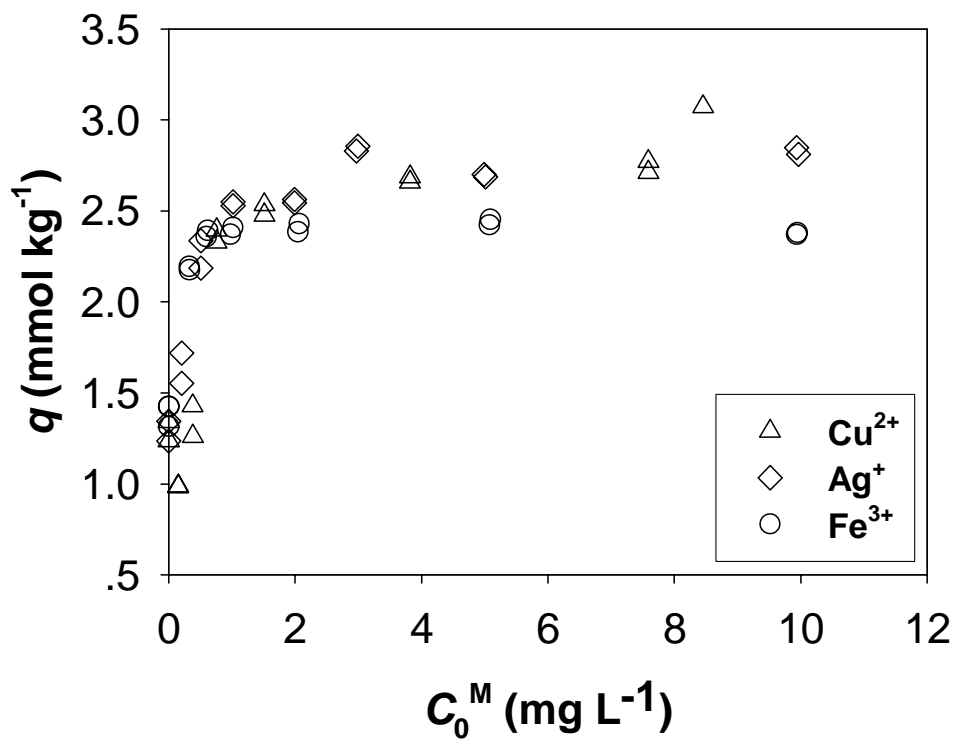

Figure S2. Sorbed concentration ( $q$ ) vs. initial concentration of transition metal ion ( $C_0^M$ ) at sorption equilibrium for PHEN to *E. coli* in 0.02 M NaNO<sub>3</sub>. The equilibrium pH is 5.83±0.06 for Cu<sup>2+</sup>, 6.16±0.05 for Ag<sup>+</sup>, and 5.99±0.01 for Fe<sup>3+</sup>-containing samples (n = 12-14).

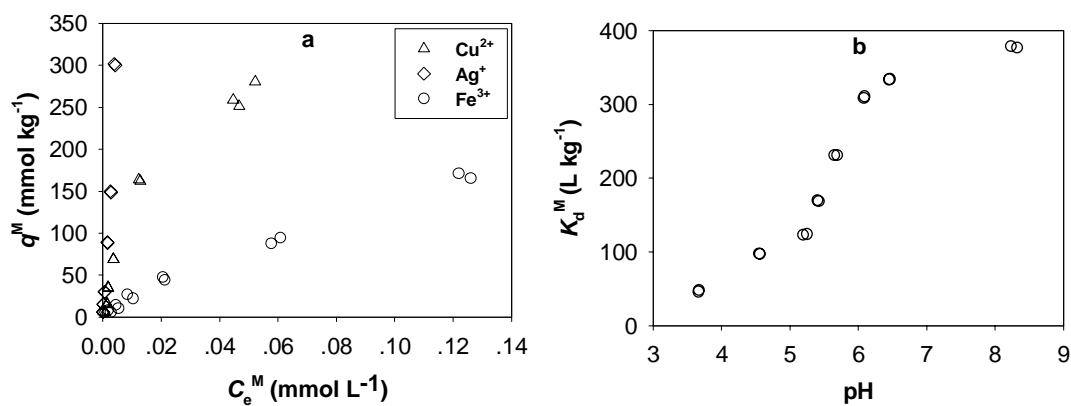

Figure S3. Sorption of heavy metals to *E. coli* in 0.02 M NaNO<sub>3</sub>. (a) Sorbed concentration ( $q^M$ ) vs. aqueous phase concentration ( $C_e^M$ ) at sorption equilibrium. The equilibrium pH is  $5.83 \pm 0.06$  for Cu<sup>2+</sup>,  $6.16 \pm 0.05$  for Ag<sup>+</sup>, and  $5.99 \pm 0.01$  for Fe<sup>3+</sup>-containing samples ( $n = 12-14$ ). (b) Distribution coefficient ( $K_d^M$ ) vs. pH for Cu<sup>2+</sup>.
